# Supplementary material for: Chronic toxicity of crude ricinine in rats assessed by1H NMR metabolomics analysis
Source: Royal Society of Chemistry journal article supplement (doi:10.1039/c4ra14660c), 2015-01-01
Supplement: c4ra14660c1.pdf [file c4ra14660c1.pdf]

**Supplementary Information**

**Chronic toxicity of crude ricinine in rats assessed by  $^1\text{H}$  NMR  
metabolomics analysis**

Pingping Guo<sup>a†</sup>, Dandan Wei<sup>a†</sup>, Junsong Wang<sup>\*b</sup>, Ge Dong<sup>a</sup>, Qian Zhang<sup>a</sup>, Minghua  
Yang<sup>a</sup>, Lingyi Kong<sup>\*a</sup>

*<sup>a</sup>State Key Laboratory of Natural Medicines, Department of Natural Medicinal Chemistry, China  
Pharmaceutical University, 24 Tong Jia Xiang, Nanjing 210009, PR China. Fax/Tel: 86-25-8327-  
1405; E-mail: [cpu\\_lykong@126.com](mailto:cpu_lykong@126.com)*

*<sup>b</sup>Center for Molecular Metabolism, Nanjing University of Science & Technology, 200 Xiao Ling Wei  
Street, Nanjing 210094, PR China. Tel: 86-25-8431-5512; E-mail: [wang.junsong@gmail.com](mailto:wang.junsong@gmail.com)*

\*Corresponding author: Prof. Junsong Wang and Prof. Lingyi Kong

† These authors contributed equally to this work

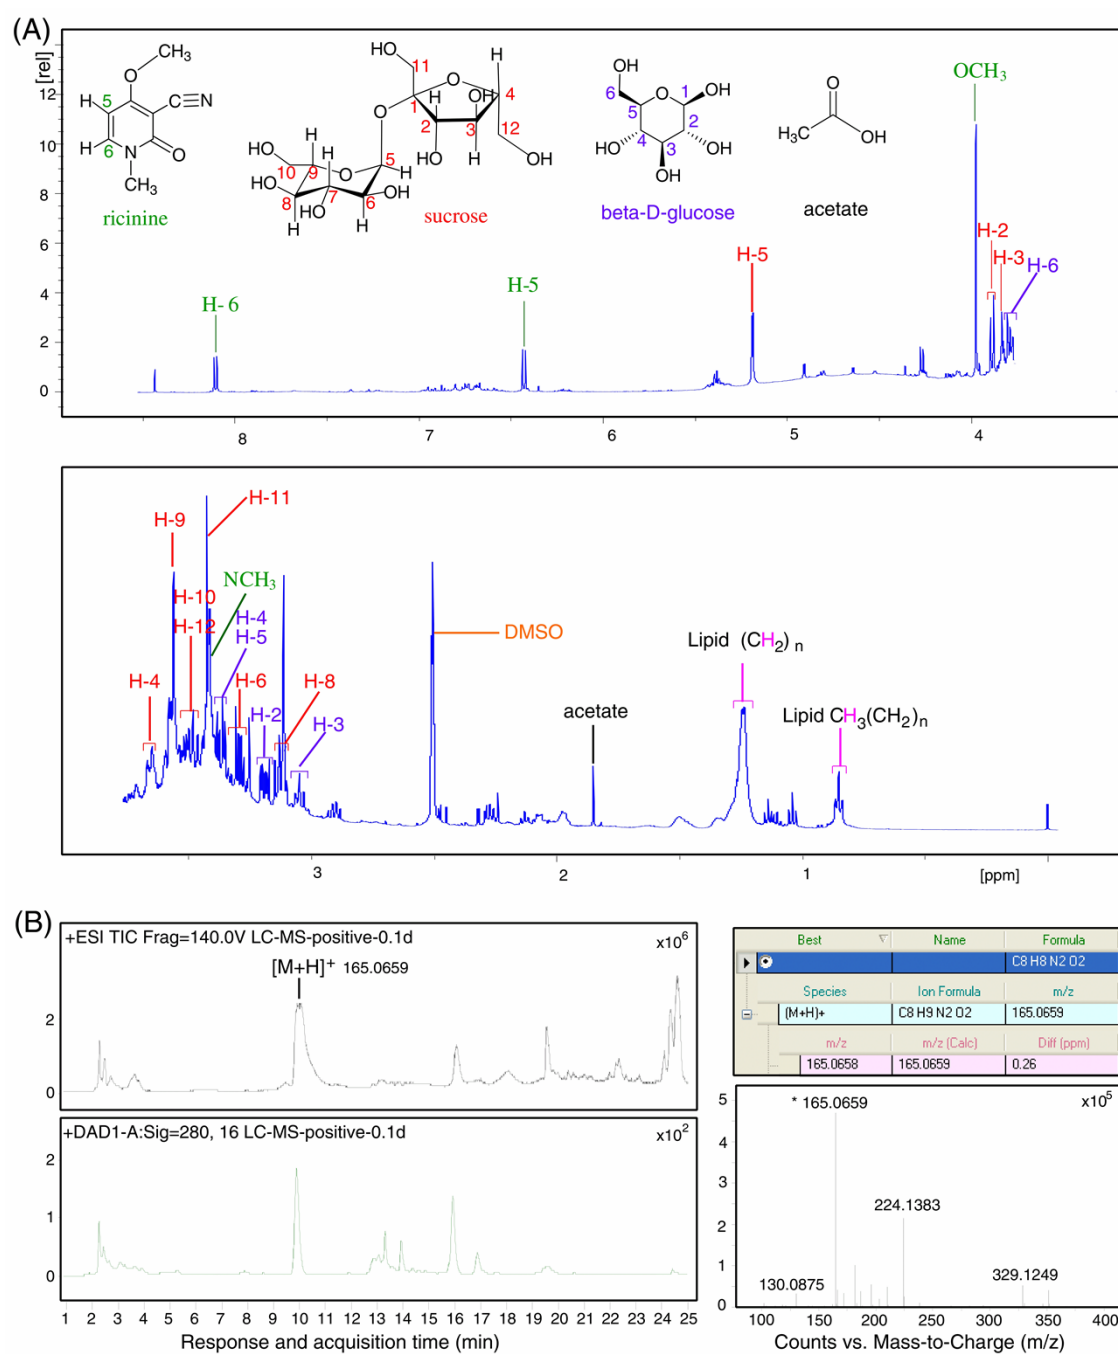

19

20

21 **Fig.S1** <sup>1</sup>H NMR (500 MHz, DMSO) spectrum (A) and LC-MS spectrum (B) of ricinine from CBS  
 22 extract.

23

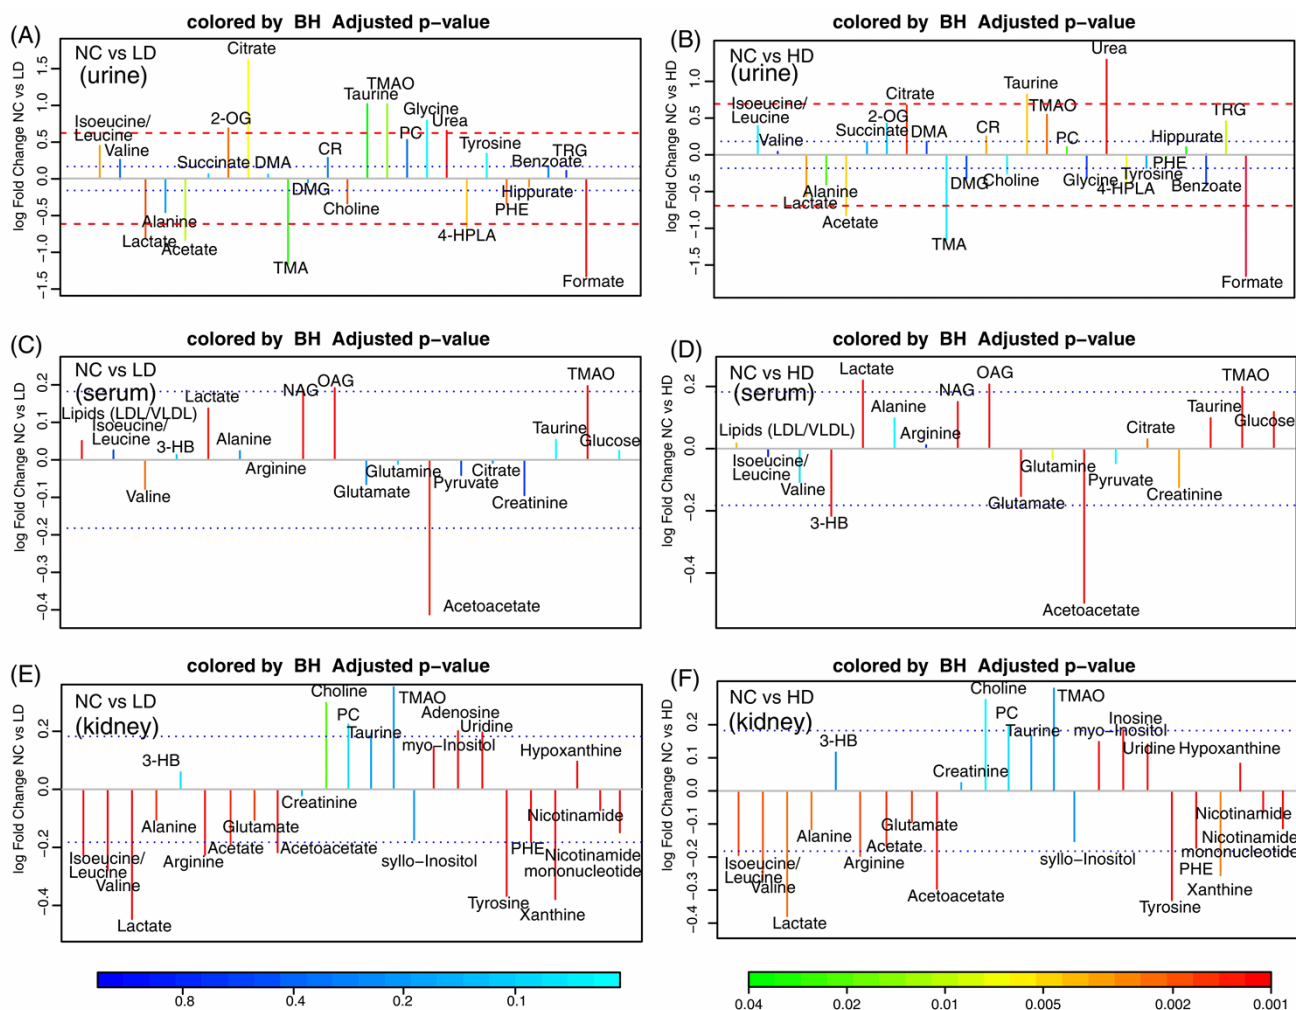

24

25 **Fig.S2** Color-coded fold change plots adjusted by Benjamini-Hochberg method indicating  
 26 significance of altered metabolites in LD rats (A, C, E) and HD rats (B, D, F). The blue dotted lines  
 27 and red dashed lines representing an increase or decrease of 20% and 100%, respectively.

28

29 **Table S1** Results of altered pathways in urine of HD group compared with NC

|                                                     | Total | Expected | Hits | Raw p    | -log(p)  | Holm adjust | FDR      | Impact |
|-----------------------------------------------------|-------|----------|------|----------|----------|-------------|----------|--------|
| Phenylalanine, tyrosine and tryptophan biosynthesis | 4     | 0.05     | 2    | 8.19E-04 | 7.11E+00 | 6.63E-02    | 6.03E-02 | 1.00   |
| Citrate cycle (TCA cycle)                           | 20    | 0.24     | 3    | 1.49E-03 | 6.51E+00 | 1.19E-01    | 6.03E-02 | 0.15   |
| Alanine, aspartate and glutamate metabolism         | 24    | 0.29     | 3    | 2.56E-03 | 5.97E+00 | 2.03E-01    | 6.92E-02 | 0.06   |
| Methane metabolism                                  | 9     | 0.11     | 2    | 4.74E-03 | 5.35E+00 | 3.70E-01    | 7.68E-02 | 0.00   |
| Phenylalanine metabolism                            | 9     | 0.11     | 2    | 4.74E-03 | 5.35E+00 | 3.70E-01    | 7.68E-02 | 0.41   |
| Aminoacyl-tRNA biosynthesis                         | 67    | 0.81     | 4    | 7.08E-03 | 4.95E+00 | 5.38E-01    | 9.56E-02 | 0.00   |
| Glyoxylate and dicarboxylate metabolism             | 16    | 0.19     | 2    | 1.50E-02 | 4.20E+00 | 1.00E+00    | 1.74E-01 | 0.41   |
| Butanoate metabolism                                | 20    | 0.24     | 2    | 2.31E-02 | 3.77E+00 | 1.00E+00    | 2.34E-01 | 0.00   |
| Pyruvate metabolism                                 | 22    | 0.27     | 2    | 2.77E-02 | 3.59E+00 | 1.00E+00    | 2.50E-01 | 0.06   |
| Ubiquinone and other terpenoid-quinone biosynthesis | 3     | 0.04     | 1    | 3.60E-02 | 3.33E+00 | 1.00E+00    | 2.79E-01 | 0.00   |
| Glycolysis or Gluconeogenesis                       | 26    | 0.32     | 2    | 3.79E-02 | 3.27E+00 | 1.00E+00    | 2.79E-01 | 0.03   |
| D-Glutamine and D-glutamate metabolism              | 5     | 0.06     | 1    | 5.93E-02 | 2.83E+00 | 1.00E+00    | 4.00E-01 | 0.00   |
| Cyanoamino acid metabolism                          | 6     | 0.07     | 1    | 7.07E-02 | 2.65E+00 | 1.00E+00    | 4.41E-01 | 0.00   |
| Taurine and hypotaurine metabolism                  | 8     | 0.10     | 1    | 9.32E-02 | 2.37E+00 | 1.00E+00    | 5.31E-01 | 0.43   |
| Nitrogen metabolism                                 | 9     | 0.11     | 1    | 1.04E-01 | 2.26E+00 | 1.00E+00    | 5.31E-01 | 0.00   |
| Primary bile acid biosynthesis                      | 46    | 0.56     | 2    | 1.05E-01 | 2.26E+00 | 1.00E+00    | 5.31E-01 | 0.06   |
| Selenoamino acid metabolism                         | 15    | 0.18     | 1    | 1.68E-01 | 1.78E+00 | 1.00E+00    | 8.00E-01 | 0.00   |
| Propanoate metabolism                               | 20    | 0.24     | 1    | 2.18E-01 | 1.52E+00 | 1.00E+00    | 9.80E-01 | 0.00   |
| Glutathione metabolism                              | 26    | 0.32     | 1    | 2.74E-01 | 1.29E+00 | 1.00E+00    | 1.00E+00 | 0.01   |
| Porphyryn and chlorophyll metabolism                | 27    | 0.33     | 1    | 2.83E-01 | 1.26E+00 | 1.00E+00    | 1.00E+00 | 0.00   |
| Glycine, serine and threonine metabolism            | 32    | 0.39     | 1    | 3.26E-01 | 1.12E+00 | 1.00E+00    | 1.00E+00 | 0.29   |
| Tyrosine metabolism                                 | 42    | 0.51     | 1    | 4.06E-01 | 9.03E-01 | 1.00E+00    | 1.00E+00 | 0.14   |
| Arginine and proline metabolism                     | 44    | 0.53     | 1    | 4.20E-01 | 8.67E-01 | 1.00E+00    | 1.00E+00 | 0.00   |
| Purine metabolism                                   | 68    | 0.82     | 1    | 5.73E-01 | 5.57E-01 | 1.00E+00    | 1.00E+00 | 0.00   |

30

31

32 **Table S2** Results of altered pathways in serum of HD group compared with NC

|                                             | Total | Expected | Hits | Raw p    | -log(p)  | Holm adjust | FDR      | Impact |
|---------------------------------------------|-------|----------|------|----------|----------|-------------|----------|--------|
| Valine, leucine and isoleucine biosynthesis | 11    | 0.13     | 4    | 3.57E-06 | 1.25E+01 | 2.89E-04    | 2.89E-04 | 1.00   |
| Aminoacyl-tRNA biosynthesis                 | 67    | 0.76     | 6    | 5.23E-05 | 9.86E+00 | 4.18E-03    | 2.12E-03 | 0.00   |
| Valine, leucine and isoleucine degradation  | 38    | 0.43     | 4    | 6.62E-04 | 7.32E+00 | 5.23E-02    | 1.67E-02 | 0.00   |
| D-Glutamine and D-glutamate metabolism      | 5     | 0.06     | 2    | 1.20E-03 | 6.73E+00 | 9.34E-02    | 1.67E-02 | 0.00   |
| Synthesis and degradation of ketone bodies  | 5     | 0.06     | 2    | 1.20E-03 | 6.73E+00 | 9.34E-02    | 1.67E-02 | 0.60   |
| Butanoate metabolism                        | 20    | 0.23     | 3    | 1.24E-03 | 6.70E+00 | 9.40E-02    | 1.67E-02 | 0.10   |
| Alanine, aspartate and glutamate metabolism | 24    | 0.27     | 3    | 2.14E-03 | 6.15E+00 | 1.60E-01    | 2.47E-02 | 0.15   |
| Citrate cycle (TCA cycle)                   | 20    | 0.23     | 2    | 2.06E-02 | 3.88E+00 | 1.00E+00    | 2.08E-01 | 0.13   |
| Pyruvate metabolism                         | 22    | 0.25     | 2    | 2.47E-02 | 3.70E+00 | 1.00E+00    | 2.22E-01 | 0.19   |
| Glycolysis or Gluconeogenesis               | 26    | 0.30     | 2    | 3.38E-02 | 3.39E+00 | 1.00E+00    | 2.74E-01 | 0.10   |
| Arginine and proline metabolism             | 44    | 0.50     | 2    | 8.74E-02 | 2.44E+00 | 1.00E+00    | 5.94E-01 | 0.08   |
| Taurine and hypotaurine metabolism          | 8     | 0.09     | 1    | 8.79E-02 | 2.43E+00 | 1.00E+00    | 5.94E-01 | 0.43   |
| Nitrogen metabolism                         | 9     | 0.10     | 1    | 9.84E-02 | 2.32E+00 | 1.00E+00    | 6.13E-01 | 0.00   |
| Selenoamino acid metabolism                 | 15    | 0.17     | 1    | 1.59E-01 | 1.84E+00 | 1.00E+00    | 8.54E-01 | 0.00   |
| Pantothenate and CoA biosynthesis           | 15    | 0.17     | 1    | 1.59E-01 | 1.84E+00 | 1.00E+00    | 8.54E-01 | 0.00   |
| Glyoxylate and dicarboxylate metabolism     | 16    | 0.18     | 1    | 1.69E-01 | 1.78E+00 | 1.00E+00    | 8.54E-01 | 0.30   |
| Starch and sucrose metabolism               | 23    | 0.26     | 1    | 2.34E-01 | 1.45E+00 | 1.00E+00    | 1.00E+00 | 0.04   |
| Galactose metabolism                        | 26    | 0.30     | 1    | 2.60E-01 | 1.35E+00 | 1.00E+00    | 1.00E+00 | 0.04   |
| Cysteine and methionine metabolism          | 28    | 0.32     | 1    | 2.77E-01 | 1.28E+00 | 1.00E+00    | 1.00E+00 | 0.02   |
| Glycine, serine and threonine metabolism    | 32    | 0.37     | 1    | 3.10E-01 | 1.17E+00 | 1.00E+00    | 1.00E+00 | 0.00   |
| Pyrimidine metabolism                       | 41    | 0.47     | 1    | 3.80E-01 | 9.68E-01 | 1.00E+00    | 1.00E+00 | 0.00   |
| Tyrosine metabolism                         | 42    | 0.48     | 1    | 3.87E-01 | 9.49E-01 | 1.00E+00    | 1.00E+00 | 0.00   |
| Primary bile acid biosynthesis              | 46    | 0.52     | 1    | 4.15E-01 | 8.79E-01 | 1.00E+00    | 1.00E+00 | 0.03   |
| Purine metabolism                           | 68    | 0.78     | 1    | 5.51E-01 | 5.97E-01 | 1.00E+00    | 1.00E+00 | 0.00   |

33

34

35 **Table S3** Results of altered pathways in kidney of HD group compared with NC

|                                                     | Total | Expected | Hits | Raw p    | -log(p)  | Holm adjust | FDR      | Impact |
|-----------------------------------------------------|-------|----------|------|----------|----------|-------------|----------|--------|
| Aminoacyl-tRNA biosynthesis                         | 67    | 0.67     | 6    | 2.12E-05 | 1.08E+01 | 1.71E-03    | 1.71E-03 | 0.00   |
| Valine, leucine and isoleucine biosynthesis         | 11    | 0.11     | 3    | 1.25E-04 | 8.99E+00 | 1.00E-02    | 5.06E-03 | 1.00   |
| Phenylalanine, tyrosine and tryptophan biosynthesis | 4     | 0.04     | 2    | 5.50E-04 | 7.51E+00 | 4.34E-02    | 1.48E-02 | 1.00   |
| Phenylalanine metabolism                            | 9     | 0.09     | 2    | 3.20E-03 | 5.74E+00 | 2.50E-01    | 6.49E-02 | 0.41   |
| Valine, leucine and isoleucine degradation          | 38    | 0.38     | 3    | 5.44E-03 | 5.21E+00 | 4.19E-01    | 8.82E-02 | 0.00   |
| Purine metabolism                                   | 68    | 0.68     | 3    | 2.70E-02 | 3.61E+00 | 1.00E+00    | 3.43E-01 | 0.04   |
| Ubiquinone and other terpenoid-quinone biosynthesis | 3     | 0.03     | 1    | 2.97E-02 | 3.52E+00 | 1.00E+00    | 3.43E-01 | 0.00   |
| Ascorbate and aldarate metabolism                   | 9     | 0.09     | 1    | 8.66E-02 | 2.45E+00 | 1.00E+00    | 8.77E-01 | 0.00   |
| Pantothenate and CoA biosynthesis                   | 15    | 0.15     | 1    | 1.40E-01 | 1.96E+00 | 1.00E+00    | 1.00E+00 | 0.00   |
| Pyruvate metabolism                                 | 22    | 0.22     | 1    | 1.99E-01 | 1.61E+00 | 1.00E+00    | 1.00E+00 | 0.00   |
| Glycolysis or Gluconeogenesis                       | 26    | 0.26     | 1    | 2.31E-01 | 1.46E+00 | 1.00E+00    | 1.00E+00 | 0.00   |
| Galactose metabolism                                | 26    | 0.26     | 1    | 2.31E-01 | 1.46E+00 | 1.00E+00    | 1.00E+00 | 0.00   |
| Inositol phosphate metabolism                       | 26    | 0.26     | 1    | 2.31E-01 | 1.46E+00 | 1.00E+00    | 1.00E+00 | 0.14   |
| Glycerophospholipid metabolism                      | 30    | 0.30     | 1    | 2.62E-01 | 1.34E+00 | 1.00E+00    | 1.00E+00 | 0.02   |
| Glycine, serine and threonine metabolism            | 32    | 0.32     | 1    | 2.77E-01 | 1.28E+00 | 1.00E+00    | 1.00E+00 | 0.00   |
| Pyrimidine metabolism                               | 41    | 0.41     | 1    | 3.41E-01 | 1.07E+00 | 1.00E+00    | 1.00E+00 | 0.01   |
| Tyrosine metabolism                                 | 42    | 0.42     | 1    | 3.48E-01 | 1.06E+00 | 1.00E+00    | 1.00E+00 | 0.14   |
| Arginine and proline metabolism                     | 44    | 0.44     | 1    | 3.61E-01 | 1.02E+00 | 1.00E+00    | 1.00E+00 | 0.08   |

36

37

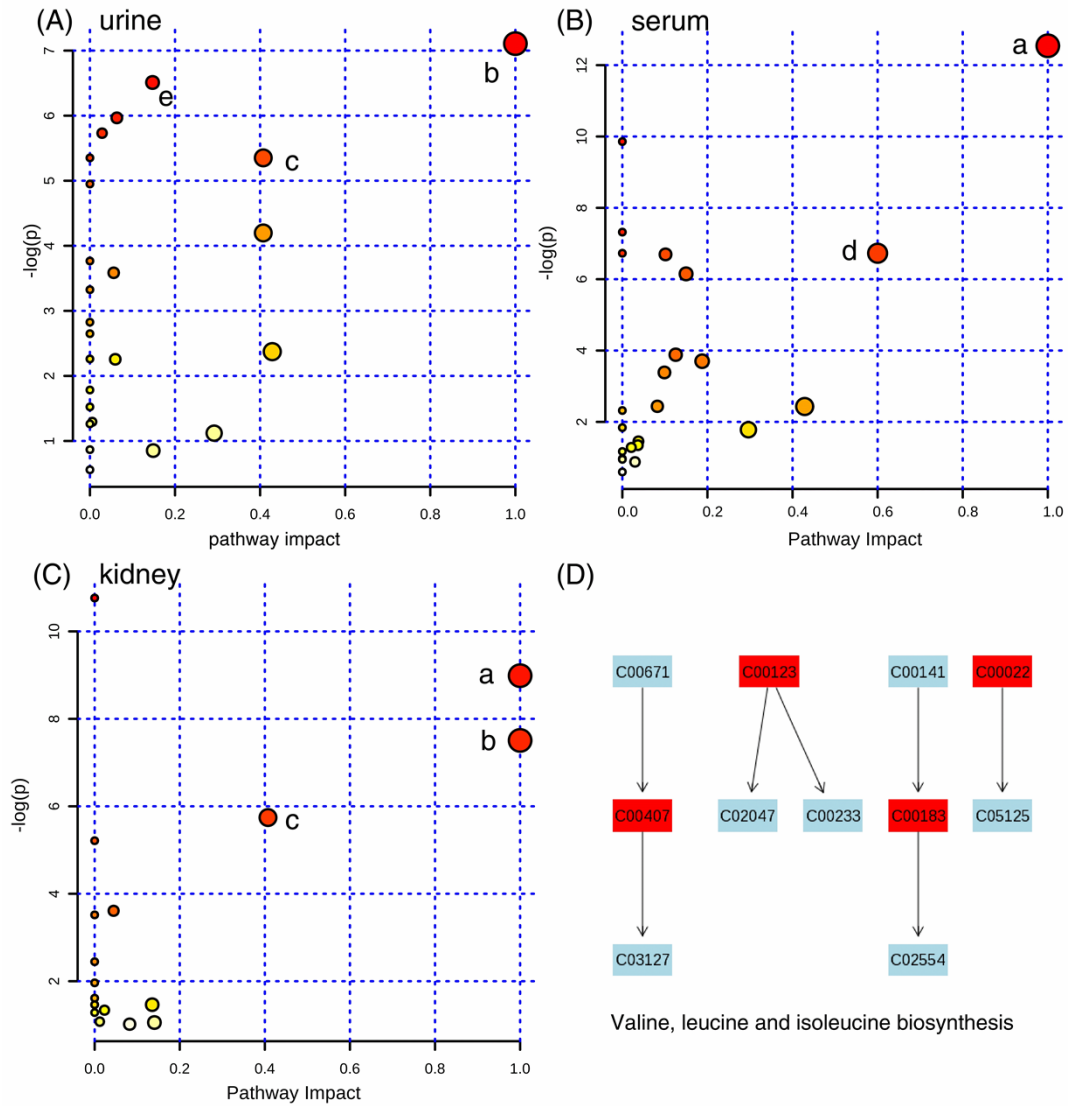

38

39 **Fig. S3** Overview of altered metabolic pathways in urine (A), serum (B), kidney (C) and the pathway  
 40 flowchart of most impacted valine, leucine and isoleucine biosynthesis (D) of HD rats compared with  
 41 NC rats as visualized by bubble plots. Bubble area is proportional to the impact of each pathway,  
 42 with color denoting the significance from highest in red to lowest in white. ((a) Valine, leucine and  
 43 isoleucine biosynthesis; (b) Phenylalanine, tyrosine and tryptophan biosynthesis; (c) Phenylalanine  
 44 metabolism; (d) Synthesis and degradation of ketone bodies; (e) TCA cycle).
